# Supplementary material for: Protocol of the Fit-For-Fertility study: a multicentre randomised controlled trial assessing a lifestyle programme targeting women with obesity and infertility
Source: PubMed Central journal article supplement — BMJ Open. 2022 Apr 18;12(4):e061554. doi: 10.1136/bmjopen-2022-061554 (PMC9020282; doi:10.1136/bmjopen-2022-061554), 2022-04-18
Supplement: bmjopen-2022-061554.reviewer_comments.pdf [file bmjopen-2022-061554.reviewer_comments.pdf]

## PEER REVIEW HISTORY

BMJ Open publishes all reviews undertaken for accepted manuscripts. Reviewers are asked to complete a checklist review form (<http://bmjopen.bmj.com/site/about/resources/checklist.pdf>) and are provided with free text boxes to elaborate on their assessment. These free text comments are reproduced below.

## ARTICLE DETAILS

|                            |                                                                                                                                                                                                                                                                                                  |
|----------------------------|--------------------------------------------------------------------------------------------------------------------------------------------------------------------------------------------------------------------------------------------------------------------------------------------------|
| <b>TITLE (PROVISIONAL)</b> | Protocol of the Fit-For-Fertility Study: a multicentre randomized controlled trial assessing a lifestyle program targeting women with obesity and infertility                                                                                                                                    |
| <b>AUTHORS</b>             | Belan, Matea; Gélinas, Myriam; Carranza-Mamane, Belina; Langlois, Marie-France; Morisset, Anne-Sophie; Ruchat, Stephanie-May; Lavoie, Kim; Adamo, Kristi; Poder, Thomas; Gallagher, Frances; Pesant, Marie-Hélène; Jean-Denis, Farrah; Baillargeon, Jean-Patrice; Fit-For-Fertility, Study Group |

This article was not externally reviewed at BMJ Open. Protocols that have been independently assessed prior to submission to BMJ Open are usually fast-tracked to publication on the grounds that further substantial changes will not be possible. This independent assessment will usually be external, independent review for both a substantial grant award from a non-commercial or government funder and ethics approval.
