# Supplementary material for: Protocol of the Fit-For-Fertility study: a multicentre randomised controlled trial assessing a lifestyle programme targeting women with obesity and infertility
Source: HighWire-hosted journal article supplement (doi:10.1136/bmjopen-2022-061554), 2022-04-01
Supplement: bmjopen-2022-061554supp001_data_supplement.pdf [file bmjopen-2022-061554supp001_data_supplement.pdf]

**RESEARCH INFORMATION AND CONSENT FORM**1  
2  
3  
4  
5  
6  
7  
8  
9  
10  
11  
12  
13  
14  
15  
16  
17  
18  
19  
20  
21  
22

**Study title:** *Fit-for-Fertility Multicenter Randomized Controlled Trial*: Improving Reproductive, Maternal and Neonatal Outcomes in Obese and Infertile

**Study number:** MP-31-2019-2802

**Study funding** Canadian Institutes of health research  
Ferring Inc.

**Principal investigator:** Jean-Patrice Baillargeon, Department of Medicine,  
Division of Endocrinology

**Co-investigator(s):** Belina Carranza-Mamane, Department of  
Obstetrics and Gynecology  
Marie-Hélène Pesant, Department of Medicine,  
Division of Endocrinology

23  
24  
25  
26  
27  
28  
29  
30  
31  
32  
33  
34

|                                                            |                                                                                              |
|------------------------------------------------------------|----------------------------------------------------------------------------------------------|
| <b>For information</b>                                     |                                                                                              |
| <b>From Monday through Friday, from 8 a.m. to 4 p. m.:</b> |                                                                                              |
| <b>Dr. Jean-Patrice Baillargeon</b>                        | Tel.: 819-346-1110, ext. 14853 or dial "0" and ask the operator to call him on pager # 9401. |
| Endocrinologist                                            |                                                                                              |
| <b>Ms. Farrah Jean-Denis,</b>                              | Tel.: 819-346-1110, ext. 12814 or dial "0" and ask the operator to call her on pager # 8869. |
| Research Coordinator                                       |                                                                                              |

35  
36  
37  
38  
39  
40  
41  
42  
43  
44  
45

We are asking for your participation in a research study because you are currently consulting for a fertility problem. However, before agreeing to participate in this study, please take the time to carefully read, understand and consider the following information. If you accept to take part in this research study, you will be required to sign the consent form at the end of this document, and we will give you a signed copy for your records.

This information and consent form explains the purpose of this research project, its procedures, risks and inconveniences as well as the benefits, and who to contact if necessary. This document may contain words you do not understand. We invite you to ask any questions you may have to the study investigator or other people involved in

46 the research project and ask them to explain any words or information you do not  
47 understand.

#### 48 **NATURE AND OBJECTIVES OF THE RESEARCH STUDY**

49 Obesity increases the risk of developing the polycystic ovary syndrome (PCOS), which  
50 is characterized by the absence of ovulation, but it is also associated with fertility  
51 problems even in women who ovulate. In addition, obesity reduces the effectiveness of  
52 assisted reproduction procedures, including fertility drug treatments. It has also been  
53 observed that women who become pregnant and who are obese have a higher risk of  
54 complications during pregnancy, delivery and for the newborn. However, it has been  
55 shown that a slight weight loss of about 5% of total weight can restore ovulation and  
56 improve pregnancy rates.

57 The purpose of this study is to evaluate the effects of a lifestyle management program  
58 on fertility, the course of pregnancy and childbirth, and the health of the newborn. We  
59 anticipate that a total of approximately 616 patients from 7 fertility clinics across Canada  
60 will participate. Of this total, approximately 53 patients will be from the *CIUSSS de*  
61 *l'Estrie – CHUS*.

#### 62 **STUDY PROCEDURES**

63 If you accept to participate in the study, you will have 2 to 5 evaluation visits at the  
64 Research Centre of the CHUS (RC-CHUS) (Fleurimont) over a period of about 18  
65 months.

66  
67 Initial visit:

- 68 - Measurement of your height, weight, body fat percentage (with electrical  
69 bioimpedance analysis) and waistline. The use of an electrical bioimpedance  
70 analysis in standing position involves the transmission of a very light electrical  
71 current through the body tissues from the soles of the feet for a few seconds.  
72 This electrical current causes no pain and is safe for the human health.
- 73 - Measurement of your blood pressure and your resting heart rate.
- 74 - Blood sample (approximately one tablespoon, or 15 mL).
- 75 - Questionnaires to fill (approximately 1 ½ hour).
- 76 - Walking test (walking as fast as possible for 6 minutes, going back and forth for a  
77 distance of 20 meters).
- 78 - You will be given a Fitbit monitor. You will have to wear it continuously for a  
79 period of 7 consecutive days. Wearing the monitor will allow us to assess your  
80 level of physical activity and the quality of your sleep over a week.

81  
82 The duration of this initial visit is approximately 2 ½ hours.

83  
84 After this visit, you will be assigned randomly (like at the flip of a coin) in one of the 2  
85 groups: the intervention group or the control group.

86

87 **Intervention group:**

88 In the days following the initial visit, a second appointment will be scheduled for a one-  
89 hour meeting with the nutritionist and kinesiologist (30 minutes with each) to begin the  
90 lifestyle modification program. You will have an individualized follow-up with these  
91 professionals every 6 weeks (30 minutes with each) at the RC-CHUS or the first 6  
92 months, then every 8 weeks for the next 6 months and every 12 weeks for the last 6  
93 months or until delivery. During these visits, you will also be asked to fill out a short  
94 questionnaire concerning the costs that these meetings imply for you. In order to offer  
95 you more support, the nutritionist or kinesiologist will also follow up with you by phone or  
96 email between your appointments at the RC-CHUS. With your agreement and solely for  
97 the purpose of evaluating the intervention proposed in this research project, the  
98 individual meetings of the intervention program will be recorded.

99

100 Participants in the intervention group will also have a group session once a week where  
101 different nutrition topics are discussed (8 topics, 45-minutes each), in addition to  
102 sessions where physical activities are practiced (8 different physical activities). You will  
103 be required to attend all 8 different sessions at the CHUS at Hotel-Dieu, within the first  
104 6 months of your participation. For the remaining duration of the project, up to 18  
105 months or as long as there are no contraindications during pregnancy, you are  
106 encouraged to continue your participation in the physical activity sessions, which last 45  
107 minutes.

108

109 During the first 6 months of the program, you must agree to receive no fertility  
110 treatments, including fertility medications. After this period, if you are not pregnant, you  
111 will be seen by your fertility specialist and received required interventions according to  
112 standard fertility care.

113

114 **Control group:**

115 From the beginning of the project, you will consult your fertility specialist and receive  
116 standard fertility care.

117

118

119 **For both groups:**

120 Evaluation visits at 6 months, 12 months and the final visit at 18 months if no  
121 pregnancy:

122 You must be fasting for the 12 hours preceding those visits. During those visits you will  
123 go through the same tests as the initial visit. The visits should last about 2 hours.

124

125 **If you become pregnant, 2 visits are planned:**

126 1<sup>st</sup> pregnancy visit (if no evaluation visit during the last month) and final pregnancy visit  
127 between 24 and 28 weeks of pregnancy:

128 You must be fasting for the 12 hours preceding those visits. During those visits you will  
129 go through the same tests as the initial visit, except for the walk test that will not be  
130 done at the final pregnancy visit. The visits should last about 2 hours.

131

132 **Please refer to the calendar at the end of the present document for a global view**  
133 **of the tests and procedures realized during the research project.**  
134

135 In addition to these visits, we will consult your personal health records to gather  
136 information regarding the fertility treatments used, the progress of your pregnancy, your  
137 delivery and your baby. In order to obtain general health information on your baby, we  
138 will access his or her personal health records. We will also be able to assess some of  
139 the components of your health-related costs based on your hospital visits as described  
140 in your record. In case we need information from your personal health records in a  
141 hospital other than the CHUS, we will have you sign an access request.  
142

143 At the end of the project, some patients from the control and the intervention groups will  
144 be invited to participate in a focus group. These patients will be selected according to a  
145 list of criteria. The following topics will be discussed: satisfaction and perceptions of the  
146 care received and the impact of the program on quality of life. To ensure accurate data  
147 collection, the discussion will be recorded. All records will be destroyed after  
148 transcription.  
149

#### 150 **PARTICIPANT'S COOPERATION**

151 We ask your collaboration to inform us as soon as possible in case of a pregnancy. For  
152 the participants in the intervention group, we ask that you attend all individual  
153 appointments in the lifestyle program and the 8 group sessions, and to notify us as soon  
154 as possible if you are unable to attend one of your appointments.

#### 155 **RISKS AND INCONVENIENCES THAT MAY ARISE FROM THE SUBJECT'S** 156 **PARTICIPATION IN THE RESEARCH STUDY**

157 Your participation in this study involves minimal risk. The risks associated with having  
158 blood samples taken are: mild pain, dizziness, fainting, bruising, bleeding, and in rare  
159 cases, blood clots and infection.

160 For the participants in the intervention group, exercise demonstrations will be done  
161 under the supervision of a kinesiologist. The risk of injury is very low since the exercise  
162 will be done in a way to provide a gradual effort and respect your abilities. However, you  
163 may feel muscle aches the day after the activity, but these will be only be short-lived.

164 Travel is required for participation in the lifestyle program: approximately 10 meetings  
165 for the individual follow-ups and at least 8 group sessions.

#### 166 **RISKS OF INFORMATION DISCLOSURE**

167 For the participants in the intervention group, you may feel some discomfort with the  
168 recording of the individual meetings with the kinesiologist and the nutritionist. In such a  
169 case, you will be free to ask that the recording be stopped.

170 For the participants in the control and intervention groups who will take part in the focus  
171 group, the facilitation will be designed and carried out in such a way as to make you as

172 comfortable as possible, in particular by reminding everyone their right to be different.  
173 Furthermore, you are in no obligation to answer any questions. If you feel  
174 uncomfortable, you may share it with the facilitator in private or in front of the group. The  
175 facilitator will take the time to listen to you and see what can reassure you.

## 176 **BENEFITS RESULTING FROM YOUR PARTICIPATION IN THE RESEARCH STUDY**

177 There may be a personal benefit to you from your participation in this research project,  
178 but we cannot guarantee it. Furthermore, the ensuing information from this research  
179 project could contribute to the advancement of knowledge in the field of infertility.

## 180 **VOLUNTARY PARTICIPATION AND RIGHT TO WITHDRAW**

181 Your participation in this research project is voluntary. You are therefore free to refuse  
182 to participate. You may also withdraw from the project at any time, without giving any  
183 reason, by informing the research team.

184 Your decision not to participate in the study, or to withdraw this research project, will  
185 bear no consequences on your relationship with the research team.

186 Unless you inform us otherwise, if you withdraw or are withdrawn from the study, the  
187 information and material already collected during the study will still be stored, analysed  
188 or used to ensure scientific integrity of the study.

189 Any new knowledge acquired during the course of the project that could have an impact  
190 on your decision to continue participating in this research project will be communicated  
191 to you as soon as possible.

## 192 **CONFIDENTIALITY**

### 193 Collection - Reason for which personal information is requested.

194 During your participation in this research project, the study investigator and his/her  
195 study staff will collect and record information about you in a study file. They will only  
196 collect information required to meet the scientific goals of this study.

197

### 198 Collection – What personal information will be collected

199 The study file may include information from your medical chart regarding your past and  
200 present state of health, your lifestyle, as well as the results of tests, exams, and  
201 procedures that you will undergo during this research project. Your research file could  
202 also contain other information, such as your name, sex, date of birth and ethnic origin.

203

### 204 Data/information storage - Protection

205 All the information collected will remain confidential to the extent provided by law. You  
206 will only be identified by a code number. The key to the code linking your name to your  
207 study file will be kept by the doctor in charge of this research study.

208 To ensure your safety, your participation in this research study will be mentioned in your  
209 medical chart. Consequently, any person or company to whom you give access to your  
210 medical file will have access to that information.

211

212 Duration of data storage

213 The research data will be kept during 25 years by the investigator in charge of the  
214 research study.

215

216 Dissemination of results

217 Results of the research could be published or discussed during scientific meetings, but  
218 it will be impossible to identify you.

219

220

221

222 Right of access for monitoring and safety

223 For monitoring, control, protection and safety, your study file could be examined by  
224 persons mandated by the institution or the Research Ethics Board. These individuals  
225 observe confidentiality policies.

226 You have the right to access your study file in order to verify the information gathered,  
227 and to have it corrected if necessary.

228 **COMPENSATION**

229 As compensation for the costs incurred as a result of your participation in the research  
230 project, you will receive an amount of 20\$ per evaluation visit. If you withdraw or are  
231 withdrawn from the study before its completion (or if your participation is ended), the  
232 compensation will be proportional to the duration of your participation.

233

234 Your parking fees related to your evaluation visits will be covered using a prepaid code  
235 that we will be given for each of your research evaluation visits. This does not include  
236 the visits associated to the intervention program for the participants in this group.

237 **FUNDING**

238 This project is funded mainly by the Canadian Institutes of Health Research, an agency  
239 of the Government of Canada responsible for investing in health research. This project  
240 also benefits of the support of private companies, but no amount is intended to cover  
241 salaries or advantages for the research team. All the financial support is dedicated to  
242 the realization of the study.

243 **IN CASE OF PREJUDICE**

244 Should you suffer any harm as a result of your participation in the research project, you  
245 will receive all the care and services required by your health condition.

246

247 By agreeing to participate in this research project, you do not waive any of your legal  
248 rights nor do you release the researcher responsible for this research project and the  
249 establishment of their civil and professional responsibilities

250 **CONTACT PERSONS**

251 If you have any questions or problems related to the research study or if you wish to  
252 withdraw from the research project, you can contact the physician in charge or a person  
253 from the research team. Please refer to the box on page 1.

254 If you have any questions about your rights as a participant in this research study or if  
255 you have any complaints, you can contact the *CIUSSS de l'Estrie – CHUS*' Office of  
256 Complaints and Quality of Services at [plaintes.ciussse-chus@ssss.gouv.qc.ca](mailto:plaintes.ciussse-chus@ssss.gouv.qc.ca) or at the  
257 following number: 1-866-917-7903.

258 **MONITORING OF ETHICAL ASPECTS OF THE STUDY**

259 The Research Ethics Board of the *CIUSSS de l'Estrie – CHUS* approved this study and  
260 is in charge of its monitoring for the participating institutions of the Québec Health and  
261 Social Services Network.

262 If you wish to contact a member of that board, you can reach the Research Ethics  
263 Support Services of the *CIUSSS de l'Estrie - CHUS* at [ethique.chus@ssss.gouv.qc.ca](mailto:ethique.chus@ssss.gouv.qc.ca)  
264 or at the following number: 819-346-1110, ext. 12856.

265 **FOLLOW-UP STUDIES**

266 In the event that future research projects following or similar to the current project are  
267 conducted, would you agree to be contacted by a member of the research team to offer  
268 you a new participation? Of course, during this call, you would be entirely free to accept  
269 or refuse to participate.

270

271  YES  NO

272

273 **CONSENT**

274 I have reviewed the *Information and Consent Form*. The research project and this  
 275 information and consent form have been explained to me. My questions were answered  
 276 and I was given the time to decide. Upon reflection, I consent to participate in this  
 277 research study project under the conditions stated above.

278 I authorize the research team to access my medical records.

279

280

281 I accept that the individual meetings for the purpose of the intervention program will be  
 282 recorded.

283  YES  NO

284

285

286

287

288

289

---

| 290 <i>Participant's name</i> | 290 <i>Participant's signature</i> | 290 <i>Date</i> |
|-------------------------------|------------------------------------|-----------------|
| 291 <i>(block letters)</i>    |                                    |                 |

292

293

294

295

296 I explained the research project and this Information and Consent Form to the  
 297 participant and answered her questions.

298

299

300

301

302

303

---

| 304 <i>Name of the person who</i> | 304 <i>Signature of the person who</i> | 304 <i>Date</i> |
|-----------------------------------|----------------------------------------|-----------------|
| 305 <i>obtained consent</i>       | 305 <i>obtained consent</i>            |                 |
| 306 <i>(block letters)</i>        |                                        |                 |

307



308 **CALENDAR FOR RESEARCH AND INTERVENTION VISITS**

309 Boxes marked with an X indicated tests and data collected at each visit:

310

|                                                                 | Initial visit | 6-month visit | 12-month visit | 18-month visit (final visit) | Intervention sessions <sup>2</sup> | Weekly Group Workshops (8 weeks) <sup>2</sup> |
|-----------------------------------------------------------------|---------------|---------------|----------------|------------------------------|------------------------------------|-----------------------------------------------|
| Physical examination (weight, height, blood pressure and pulse) | x             | x             | x              | x                            | x                                  |                                               |
| Blood test                                                      | x             | x             | x              | x                            |                                    |                                               |
| Questionnaires                                                  | x             | x             | x              | x                            | x                                  | x                                             |
| Fitbit journal                                                  | x             | x             | x              | x                            |                                    |                                               |
| 6-minutes walk test                                             | x             | x             | x              | x                            |                                    |                                               |
| Nutritionist and kinesiologist                                  |               |               |                |                              | x                                  | x                                             |

311

312 For women who become pregnant during the study:

313

|                                                                     | First pregnancy visit <sup>1</sup> | 24-28 weeks (final visit) | Intervention sessions <sup>2</sup> |
|---------------------------------------------------------------------|------------------------------------|---------------------------|------------------------------------|
| Physical examination (weight, height, blood pressure and heartrate) | x                                  | x                         | x                                  |
| Blood test                                                          | x                                  | x                         |                                    |
| Questionnaires                                                      | x                                  | x                         | x                                  |
| Fitbit journal                                                      | x                                  | x                         |                                    |
| 6-minutes walk test                                                 | x                                  |                           |                                    |
| Nutritionist and kinesiologist                                      |                                    |                           | x                                  |

314 <sup>1</sup> Only if the last research visit > 1 month.315 <sup>2</sup> For participants in the intervention group only.
